# Supplementary material for: Global atmospheric chemistry – which air matters
Source: Copernicus journal article supplement (doi:10.5194/acp-17-9081-2017), 2017-07-27
Supplement: Supplementary file [file acp-17-9081-2017-supplement-title-page.pdf › acp-17-9081-2017-supplement-title-page.pdf]

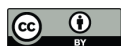

## *Supplement of*

# **Global atmospheric chemistry – which air matters**

**Michael J. Prather et al.**

*Correspondence to:* Michael J. Prather ([mprather@uci.edu](mailto:mprather@uci.edu))

- [acp-17-9081-2017-supplement-title-page.pdf](#)
- [FigS1-Final.eps](#)
- [FigS2-Final.eps](#)
- [acpd-2016-1105r-Supplement.docx](#)

The copyright of individual parts of the supplement might differ from the CC BY 3.0 License.
